# Supplementary material
Source: PubMed Central journal article supplement (PMC8367600)
Supplement: 0036.pdf [file 0036.pdf]

**APPENDIX:**

**On behalf of the ENDOVASCULAR TREATMENT IN ISCHEMIC STROKE ETIS - Research**

**Investigators**

**FOR** : Michel Piotin, Raphael Blanc, Hocine Redjem, Simon Escalard, Jean-Philippe Desilles, François Delvoe, Stanislas Smajda, Benjamin Maier, Hebert Solène, Mikael Mazighi, Mikael Obadia, Candice Sabben, Pierre Seners, Igor Raynouard, Ovide Corabianu, Thomas de Broucker, Eric Manchon, Guillaume Taylor, Malek Ben Maacha, Laurie-Anne Thion, Augustin Lecler, Julien Savatovsji

**FOCH** : Adrien Wang, Serge Evrard, Maya Tchikviladze, Nadia Ajili, Bertrand Lapergue, David Weisenburger-Lile, Lucas Gorza, Géraldine Buard, Oguzhan Coskun, Arturo Consoli, Federico Di Maria, Georges Rodesh, Sergio Zimatore, Morgan Leguen, Julie Gratieux, Fernando Pico, Haja Rakotoharinandrasana, Philippe Tassan, Roxanna Poll, Sylvie Marinier

**LYON** : Norbert Nighoghossian, Roberto Riva, Omer Eker, Francis Turjman, Laurent Derex, Tae-Hee Cho, Laura Mechtouff, Anne Claire Lukaszewicz, Frédéric Philippeau, Serkan Cakmak, Karine BlancLasserre, Anne-Evelyne Vallet

**BORDEAUX** : Gaultier Marnat, Florent Gariel, Xavier Barreau, Jérôme Berge, Patrice Menegon, Igor Sibon, Ludovic Lucas, Stéphane Olindo, Pauline Renou, Sharmila Sagnier, Mathilde Poli, Sabrina Debruxelles, François Rouanet, Thomas Tourdias, Jean-Sebastien Liegey, Pierre Briau, Nicolas Pangon

**NANTES** : Romain Bourcier, Lili Detraz, Benjamin Daumas-Duport, Pierre-Louis Alexandre, Monica Roy, Cédric Lenoble, Hubert Desal, Benoît Guillon, Solène de Gaalon, Cécile Preterre

**NANCY** : Benjamin Gory, Serge Bracard, René Anxionnat, Marc Braun, Anne-Laure Derelle, Romain Tonnelet, Liang Liao, François Zhu, Emmanuelle Schmitt, Sophie Planel, Sébastien Richard, Lisa Humbertjean, Gioia Mione, Jean-Christophe Lacour, Nolwenn Riou-Comte, Gérard Audibert, Marcela Voicu, Ionel Alb, Marie Reitter, Madalina Brezeanu, Agnès Masson, Adriana Tabarna, Iona Podar, Sarah Guy, Fatiha Bechiri

**LIMOGES**: Francisco Macian-Montoro, Suzanna Saleme, Charbel Mounayer, Aymeric Rouchaud

**MONTPELLIER** : Vincent Costalat, Caroline Arquizan , Cyril Dargazanli, Grégory Gascou, Pierre-Henri Lefèvre, Imad Derraz, Carlos Riquelme, Nicolas Gaillard, Isabelle Mourand , Lucas Corti, Federico Cagnazzo, Adrien ter Schiphorst

**RENNES** : Eugene Francois, Stéphane Vannier, Jean-christophe Ferre, Helene Raoult, Thomas Ronziere, Maria Lassale, Christophe Paya, Jean-Yves Gauvrit, Clément Tracol, Sophie Langnier Lemercier

**PITIE-SALPETRIERE** : Yves Samson, Charlotte Rosso, Anne Leger, Sandrine Deltour, Frederic Clarencon, Eimad Shotar, Mahmoud Elhorany

**KREMLIN-BICETRE** : Laurent Spelle, Christian Denier, Olivier Chassin, Vanessa Chalumeau, Jildaz Caroff, Olivier Chassin, Laura Venditti, Sophie Gallas

**SAINTE ANNE** : Olivier Naggara, Wagih Ben Hassen, Grégoire Boulouis, Christine Rodriguez-Régent, Denis Trystram, Basile Kerleroux, Guillaume Turc, Valérie Domigo, Catherine Lamy, Julia Birchenall, Clothilde Isabel, François Lun, Wassim Farhat, Matthieu Zuber, Olivier Heinzlef

**TOULOUSE** : Alain Viguiet, Christophe Cognard, Anne-Christine Januel, Jean-Marc Olivot, Nicolas Raposo, Fabrice Bonneville, Jean François Albucher, Lionel Calviere, Jean Darcourt, Philippe Tall, Guillaume Bellanger, Louis Fontaine

**CAEN** : Emmanuel Touze, Charlotte Barbier, Romain Schneckenburger, Marion Boulanger, Julien Copez, Sophie Guettier

**BREST** : Serge Timsit, Jean-Christophe Gentric, Julien Ognard, Francois Mathias Merrien

**ROUEN** : Ozlem Ozkul Wermester, Evelyne Massardier, Chrysanthi Papagiannaki

**BAYONNE**: Frédéric Bourdain, Patricia Bernady, Laurent Lagoarde-Segot, Hélène Cailliez, Louis Veunac

**STRASBOURG**: Valérie Wolff, Pop Raoul, Rémi Beaujeux, Mihoc Dan-Sorin, Monica Manisor

**VANNES**: Anthony Le Bras, Sarah Evain, Arnaud Le Guen

**PAU** : Sebastian Richter, Regis Hubrecht, Stéphanie Demasles, Bruno Barroso, Alexis Gonnet

**PERPIGNAN** : Denis Sablot, Geoffroy Farouil, Maxime Tardieu, Philippe Smadja, Sabine Aptel, Ian Seiler
